# Supplementary material for: Hydroquinone colorimetric sensing based on core–shell structured CoFe2O4@N-GQDs@CeO2 nanocomposites as oxidase mimics
Source: Royal Society of Chemistry journal article supplement (doi:10.1039/d4nj00284a), 2024-01-01
Supplement: d4nj00284a1.pdf [file d4nj00284a1.pdf]

Supporting Information for  
Hydroquinone colorimetric sensing based on Core-shell  
structured  $\text{CoFe}_2\text{O}_4@\text{N-GQDs}@\text{CeO}_2$  nanocomposites as oxidase  
mimics

Xuefang Lei<sup>1</sup>, Yujin Li<sup>1</sup>, Peiqing Guo<sup>1</sup>, Mingzhu Qiu<sup>1</sup>, Rang Meng<sup>1</sup>, Shaohui Li<sup>1</sup>,  
Dongxia Zhang<sup>1</sup>, Nali Chen<sup>1</sup>, Xibin Zhou<sup>1,\*</sup>

1 Key Laboratory of Resource Environment and Sustainable Development of Oasis,  
College of Geography and Environment Science, Northwest Normal University,  
Lanzhou 730070, China

2 School of Petrochemical Technology, Lanzhou University of Technology, Lanzhou  
730050, P.R China

E-mail address of Corresponding author:

zhouxb@nwnu.edu.cn (Xibin Zhou).

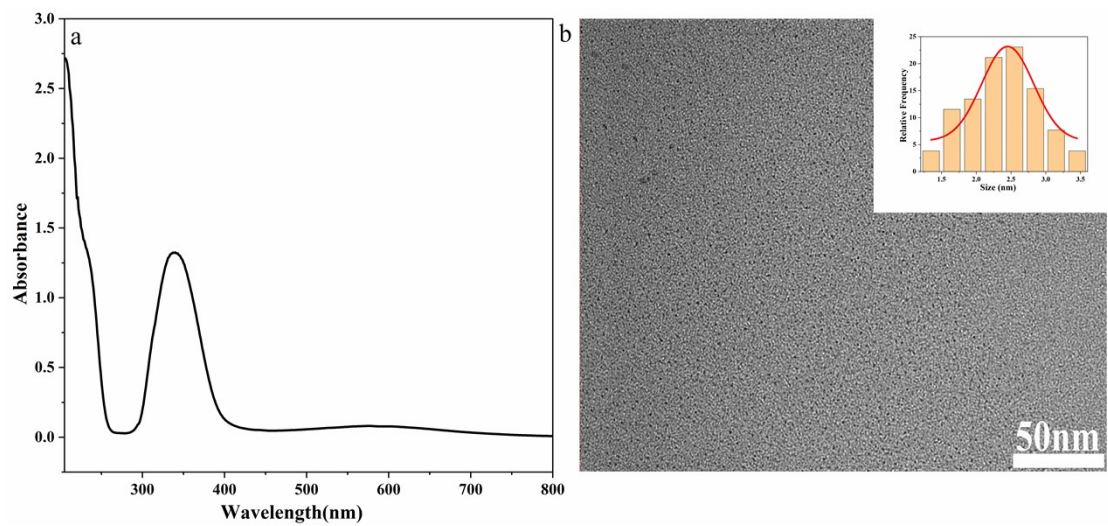

**Figure S1** (a) UV-visible spectrum of N-GQDs; (b) TEM image of N-GQDs. Inset is the size distribution of N-GQDs.

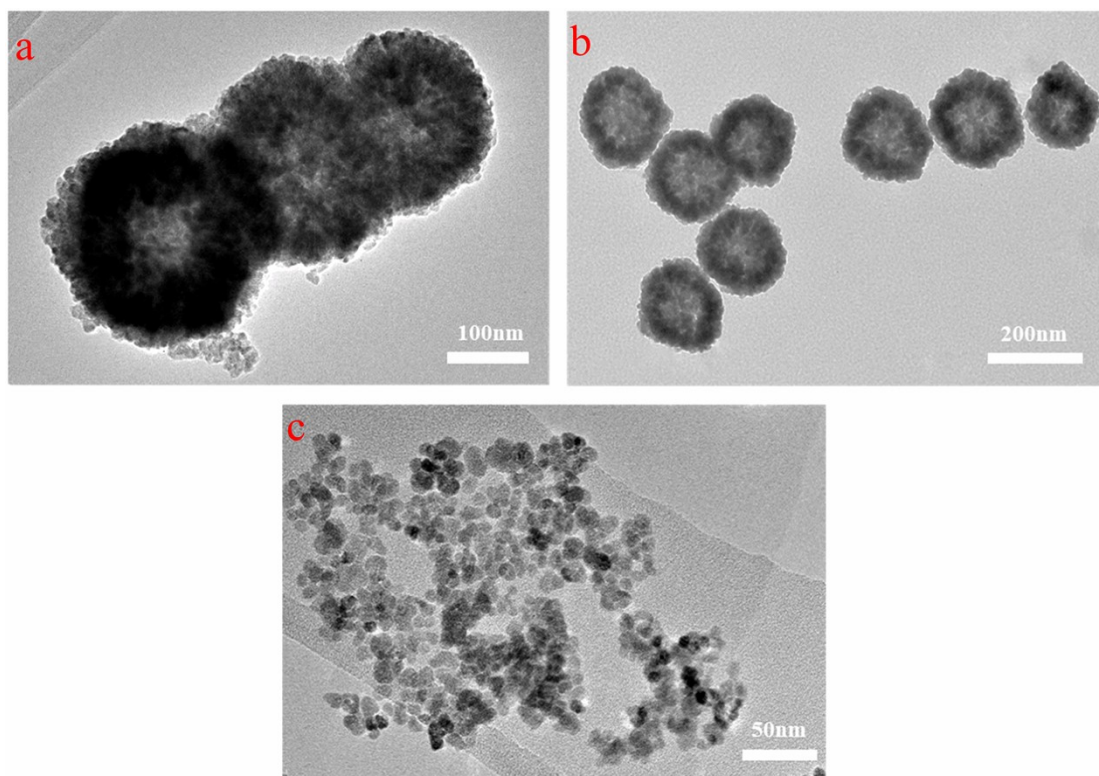

**Figure S2** TEM images of (a) CoFe<sub>2</sub>O<sub>4</sub>, (b) CoFe<sub>2</sub>O<sub>4</sub>@N-GQDs, (c) 5 CoFe<sub>2</sub>O<sub>4</sub>@N-GQDs.

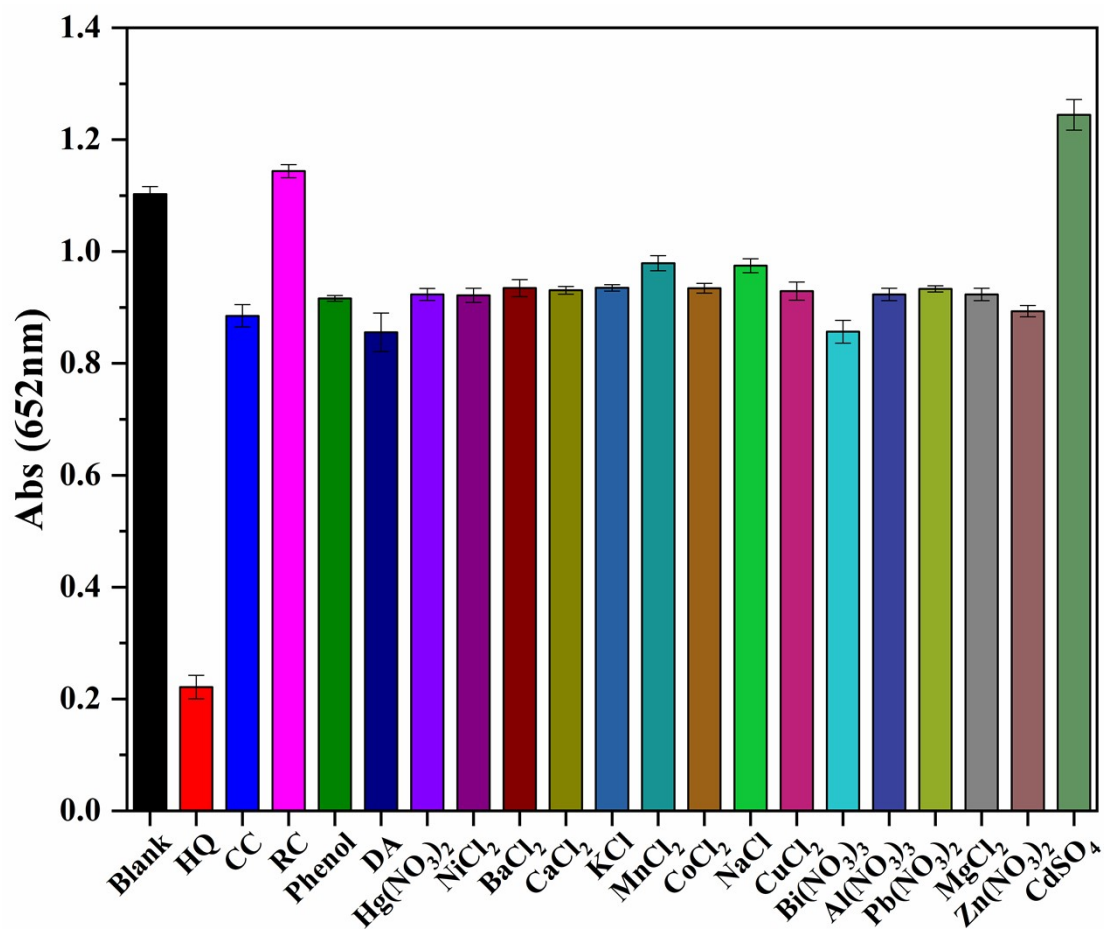

**Figure S3** The  $\text{CoFe}_2\text{O}_4@\text{N-GQDs}@ \text{CeO}_2\text{-TMB}$  system has the selectivity to detect HQ (40  $\mu\text{M}$ ) at 10 times the potential interference.

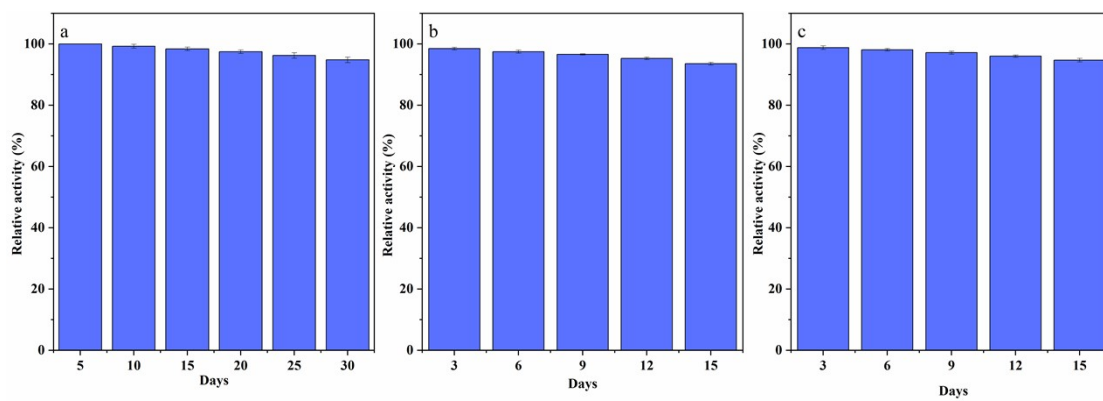

**Figure S4** Stability of the catalytic activity of CoFe<sub>2</sub>O<sub>4</sub>@N-GQDs@CeO<sub>2</sub> oxidase: (a) under optimal conditions; (b) the Yellow River water; (c) Tap water.

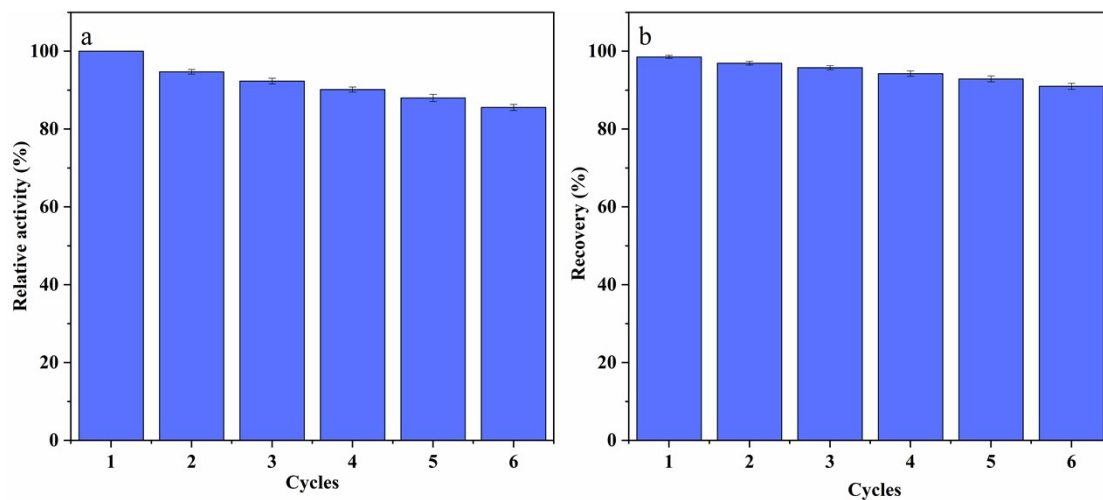

**Figure S5** (a) Relative activity (%) and (b) recovery (%) of the CoFe<sub>2</sub>O<sub>4</sub>@N-GQDs@CeO<sub>2</sub> within six cycles under the optimum conditions.

**Table S1** Comparison of the sensing performance of other catalysts in the detection of hydroquinone.

| Method           | Catalysts                                                 | Linear range( $\mu\text{M}$ ) | LOD( $\mu\text{M}$ ) | References |
|------------------|-----------------------------------------------------------|-------------------------------|----------------------|------------|
| Colorimetric     | Fe/Mn-N-C                                                 | 0-100                         | 0.216                | [1]        |
| Colorimetric     | Pt/Cds                                                    | 100-1000                      | 45.5                 | [2]        |
| Colorimetric     | NiCo <sub>2</sub> O <sub>4</sub>                          | 5-110                         | 2.7                  | [3]        |
| Colorimetric     | Co <sub>3</sub> O <sub>4</sub> -CeO <sub>2</sub>          | 2-200                         | 0.789                | [4]        |
| Colorimetric     | NiMnO <sub>3</sub>                                        | 1-85                          | 0.68                 | [5]        |
| Electrochemistry | Ce-MOF/CNTs                                               | 10-100                        | 3.5                  | [6]        |
| Electrochemistry | Pretreated PGE                                            | 10-70                         | 0.59                 | [7]        |
| Fluorometry      | C-dots                                                    | 0.1-50                        | 0.1                  | [8]        |
| Colorimetric     | CoFe <sub>2</sub> O <sub>4</sub> @N-GQDs@CeO <sub>2</sub> | 0.25-60                       | 0.166                | This work  |

- [1] Bin Liu, Z. Wang, T. Wei, Z. Liu, J. Li, Bimetallic FeMn-N nanoparticles as nanocatalyst with dual enzyme-mimic activities for simultaneous colorimetric detection and degradation of hydroquinone, *Journal of Environmental Chemical Engineering* 11(3) (2023).
- [2] X. Zhao, H. Lyu, X. Yao, C. Xu, Q. Liu, Z. Liu, X. Zhang, X. Zhang, Hydroquinone colorimetric sensing based on platinum deposited on CdS nanorods as peroxidase mimics, *Microchimica Acta* 187(10) (2020).
- [3] Y. Song, M. Zhao, H. Li, X. Wang, Y. Cheng, L. Ding, S. Fan, S. Chen, Facile preparation of urchin-like  $\text{NiCo}_2\text{O}_4$  microspheres as oxidase mimetic for colorimetric assay of hydroquinone, *Sensors and Actuators B: Chemical* 255 (2018) 1927-1936.
- [4] K. Hu, J. Li, Y. Han, D.H.L. Ng, N. Xing, Y. Lyu, A colorimetric detection strategy and micromotor-assisted photo-Fenton like degradation for hydroquinone based on the peroxidase-like activity of  $\text{Co}_3\text{O}_4\text{-CeO}_2$  nanocages, *Catalysis Science & Technology* 12(23) (2022) 7161-7170.
- [5] X. Zheng, Z. Liu, Q. Lian, H. Liu, L. Chen, L. Zhou, Y. Jiang, J. Gao, Preparation of Flower-like  $\text{NiMnO}_3$  as Oxidase Mimetics for Colorimetric Detection of Hydroquinone, *ACS Sustainable Chemistry & Engineering* 9(38) (2021) 12766-12778.
- [6] Huang H, Chen Y, Chen Z, et al. Electrochemical sensor based on Ce-MOF/carbon nanotube composite for the simultaneous discrimination of hydroquinone and catechol [J]. *Journal of Hazardous Materials*, 2021, 416: 125895.
- [7] Kumar Naik T S S, Kesavan A V, Swamy B E K, et al. Low cost, trouble-free disposable pencil graphite electrode sensor for the simultaneous detection of hydroquinone and catechol [J]. *Materials Chemistry and Physics*, 2022, 278: 125663.
- [8] Ni P, Dai H, Li Z, et al. Carbon dots based fluorescent sensor for sensitive determination of hydroquinone [J]. *Talanta*, 2015, 144: 258-62.
